# Supplementary material for: Loss of ERβ Disrupts Gene Regulation in Primordial and Primary Follicles
Source: MDPI journal article supplement (doi:10.3390/ijms25063202), 2024-03-11
Supplement: s1 [file s1]

**Supplementary Table 1.** Top 20 differentially expressed genes in *Erβ<sup>null</sup>* primordial follicles

| Gene symbol     | Full name description                                          | TPM value | Fold change | FDR p-value | Brief function                                                                  |
|-----------------|----------------------------------------------------------------|-----------|-------------|-------------|---------------------------------------------------------------------------------|
| <i>Av320801</i> | PRAME like 3E                                                  | 11.15     | 179.56      | 0.040       | No biological data is available yet                                             |
| <i>H2ac19</i>   | H2A clustered histone 19                                       | 115.44    | 94.12       | 0.006       | DNA binding                                                                     |
| <i>Or11a4</i>   | Olfactory receptor family 11 subfamily A member 4              | 12.54     | 33.31       | 0.010       | G protein-coupled receptor activity                                             |
| <i>Gm14147</i>  | Predicted gene 14147                                           | 16.71     | 31.14       | 0.001       | Nucleotide-binding                                                              |
| <i>Gm5795</i>   | Predicted gene 5795                                            | 16.06     | 25.31       | 0.020       | No biological data is available yet                                             |
| <i>Gm8947</i>   | Predicted gene 8947                                            | 11.46     | 23.41       | 0.030       | No biological data is available yet                                             |
| <i>Gm21103</i>  | Predicted gene 21103                                           | 15.46     | 20.89       | 0.020       | No biological data is available yet                                             |
| <i>Gm12184</i>  | Cyclin-dependent kinase 2 associated protein 1 retrotransposed | 18.43     | 18.96       | 0.030       | DNA polymerase binding                                                          |
| <i>Pramel28</i> | PRAME like 28                                                  | 12.79     | 18.82       | 0.030       | No biological data is available yet                                             |
| <i>Or8b41</i>   | Olfactory receptor family 8 subfamily B member 41              | 12.71     | 18.76       | 0.000       | G protein-coupled receptor activity                                             |
| <i>Gm49388</i>  | Predicted gene 49388                                           | 14.58     | -22.47      | 0.001       | RNA binding                                                                     |
| <i>Nutf2</i>    | Nuclear transport factor 2                                     | 34.53     | -21.45      | 0.003       | Structural constituent of nuclear pore                                          |
| <i>Fam151a</i>  | Family with sequence similarity 151 member A                   | 21.84     | -20.12      | 0.010       | No biological data is available yet                                             |
| <i>Vsx2</i>     | Visual system homeobox 2                                       | 159.32    | -16.35      | 0.000       | RNA polymerase II transcription regulatory region sequence-specific DNA binding |
| <i>Gm49378</i>  | Predicted gene 49378                                           | 6.53      | -10.86      | 0.050       | No biological data is available yet                                             |
| <i>Pabpn1l</i>  | Poly(A)binding protein nuclear 1-like                          | 26.83     | -10.63      | 0.040       | Nucleic acid binding                                                            |
| <i>H3c2</i>     | H3 clustered histone 2                                         | 183.28    | -9.99       | 0.000       | DNA binding                                                                     |
| <i>Tead3</i>    | EA domain family member 3                                      | 94.04     | -9.96       | 0.000       | RNA polymerase II cis-regulatory region sequence-specific DNA binding           |
| <i>Dnmt1</i>    | DNA methyltransferase (cytosine 5) 1                           | 337.80    | -8.16       | 0.000       | DNA binding                                                                     |
| <i>Gdpd2</i>    | Glycerophosphodiester phosphodiesterase domain containing 2    | 18.27     | -7.56       | 0.001       | Phosphoric diester hydrolase activity                                           |

**Supplementary Table 2.** Top 20 differentially expressed genes in *Erβ<sup>null</sup>* primary follicles

| Gene symbol     | Full name description                                         | TPM value | Fold change | FDR p-value | Brief function                                                        |
|-----------------|---------------------------------------------------------------|-----------|-------------|-------------|-----------------------------------------------------------------------|
| <i>Gm5128</i>   | PRAME like 3C                                                 | 105.00    | 116.22      | 0.000       | No biological data is available yet                                   |
| <i>Rhox4a2</i>  | Reproductive homeobox 4A2                                     | 84.46     | 85          | 0.030       | No biological data is available yet                                   |
| <i>Gm11757</i>  | Predicted gene 11757                                          | 44.42     | 82.51       | 0.040       | No biological data is available yet                                   |
| <i>Or4x18</i>   | Olfactory receptor family 4 subfamily X member 18             | 42.20     | 43.1        | 0.001       | Signal transduction                                                   |
| <i>H2bc23</i>   | H2B clustered histone 23                                      | 59.67     | 23.61       | 0.009       | Chromatin organization                                                |
| <i>Gm5798</i>   | Predicted gene 5798                                           | 43.17     | 19.16       | 0.020       | No biological data is available yet                                   |
| <i>Gm45799</i>  | Predicted gene 45799                                          | 11.76     | 16.62       | 0.020       | Protein transport                                                     |
| <i>Mageb1</i>   | MAGE family member B1                                         | 62.59     | 16.12       | 0.010       | Negative regulation of transcription by RNA polymerase II             |
| <i>Gm20605</i>  | Predicted gene 20605                                          | 14.96     | 16.07       | 0.020       | Membrane raft assembly                                                |
| <i>Vmn1r242</i> | Vomeroneasal 1 receptor 242                                   | 69.51     | 15.48       | 0.020       | G-protein coupled receptor signaling pathway                          |
| <i>Fam177a</i>  | Family with sequence similarity 177 member A                  | 35.28     | -390.51     | 0.020       | No biological data is available yet                                   |
| <i>Gm7903</i>   | Prame like 3B                                                 | 37.47     | -276.23     | 0.020       | No biological data is available yet                                   |
| <i>H4c18</i>    | H4 clustered histone 18                                       | 273.45    | -42.93      | 0.001       | DNA binding                                                           |
| <i>Zfp968</i>   | Zinc finger protein 968                                       | 22.75     | -26.11      | 0.000       | RNA polymerase II cis-regulatory region sequence-specific DNA binding |
| <i>Gm14288</i>  | Predicted gene 14288                                          | 41.52     | -22.47      | 0.000       | Regulation of DNA-templated transcription                             |
| <i>Ott</i>      | Ovary testis transcribed                                      | 29.51     | -21.76      | 0.009       | No biological data is available yet                                   |
| <i>Map1lc3a</i> | Microtubule-associated protein 1 light chain 3 alpha          | 42.55     | -18.02      | 0.020       | Protein binding                                                       |
| <i>Thoc7</i>    | THO complex 7                                                 | 49.32     | -17.39      | 0.020       | RNA Binding                                                           |
| <i>Pigyl</i>    | Phosphatidylinositol glycan anchor biosynthesis, class Y-like | 42.52     | -17.09      | 0.020       | Phosphatidylinositol N-acetylglucosaminyltransferase activity         |
| <i>Derpc</i>    | DERPC proline and glycine-rich nuclear protein                | 18.82     | -15.7       | 0.030       | Nucleus                                                               |
